# Supplementary material
Source: Royal Society of Chemistry journal article supplement (doi:10.1039/d6tc00100a)
Supplement: d6tc00100a1.pdf [file d6tc00100a1.pdf]

**Supplemental Material for**  
**High-throughput structure searches of ambient-pressure**  
**superconductors in boron-carbon clathrates**

Yao Wei,<sup>1</sup> Muguang Zhu,<sup>1</sup> Junyi Miao,<sup>1</sup> Chen  
Chen,<sup>1</sup> Shi He,<sup>1</sup> Andreas Hermann,<sup>2</sup> and Cheng Lu<sup>1,\*</sup>

*<sup>1</sup>School of Mathematics and Physics,  
China University of Geosciences (Wuhan), Wuhan 430074, China*

*<sup>2</sup>Centre for Science at Extreme Conditions and SUPA,  
School of Physics and Astronomy, University of Edinburgh, Edinburgh EH9 3JZ, UK*

(Dated: March 9, 2026)

TABLE S1: The bond lengths, ICOHP values of the B-C, B-B, and C-C bonds of the intrinsic structure of  $B_8C_4$  and  $X_2B_8C_4$  ( $X=Rb, Ca, Sr, Ba, La, Ce$ ), as well as the bader charge transfer amounts of the metal atoms doped at the apex and center were calculated.

| Structure    | B-C<br>(Å) | -ICOHP<br>(eV/atom pair) | B-B<br>(Å) | -ICOHP<br>(eV/atom pair) | C-C<br>(Å) | -ICOHP<br>(eV/atom pair) | Bader(in)<br>(eV) | Bader(out)<br>(eV) |
|--------------|------------|--------------------------|------------|--------------------------|------------|--------------------------|-------------------|--------------------|
| $B_8C_4$     | 1.603      | 3.68                     | 1.770      | 2.95                     | 1.473      | 4.85                     | -                 | -                  |
| $Rb_2B_8C_4$ | 1.729      | 6.88                     | 1.897      | 5.72                     | 1.583      | 8.88                     | 0.678             | 0.659              |
| $Ca_2B_8C_4$ | 1.679      | 5.41                     | 1.800      | 4.25                     | 1.574      | 7.77                     | 1.418             | 1.378              |
| $Sr_2B_8C_4$ | 1.719      | 6.75                     | 1.835      | 5.18                     | 1.604      | 8.17                     | 1.386             | 1.367              |
| $Ba_2B_8C_4$ | 1.783      | 3.31                     | 1.888      | 2.87                     | 1.639      | 4.13                     | 1.318             | 1.283              |
| $La_2B_8C_4$ | 1.734      | 2.52                     | 1.825      | 1.79                     | 1.632      | 3.37                     | 1.716             | 1.672              |
| $Ce_2B_8C_4$ | 1.703      | 3.32                     | 1.805      | 2.71                     | 1.608      | 3.97                     | 1.751             | 1.665              |

TABLE S2: The elastic and mechanical properties of the intrinsic  $B_8C_4$  structure and the Rb-doped compound  $Rb_2B_8C_4$  were calculated. All elastic constants and moduli are in units of GPa.

| Structure    | $C_{11}$ | $C_{12}$ | $C_{44}$ | $B$     | $G$     | $E$     | $\nu$ |
|--------------|----------|----------|----------|---------|---------|---------|-------|
| $B_8C_4$     | 453.960  | 37.552   | -43.135  | 200.990 | 48.1600 | 133.860 | 0.390 |
| $Rb_2B_8C_4$ | 426.003  | 72.303   | 120.684  | 202.046 | 120.572 | 301.702 | 0.251 |

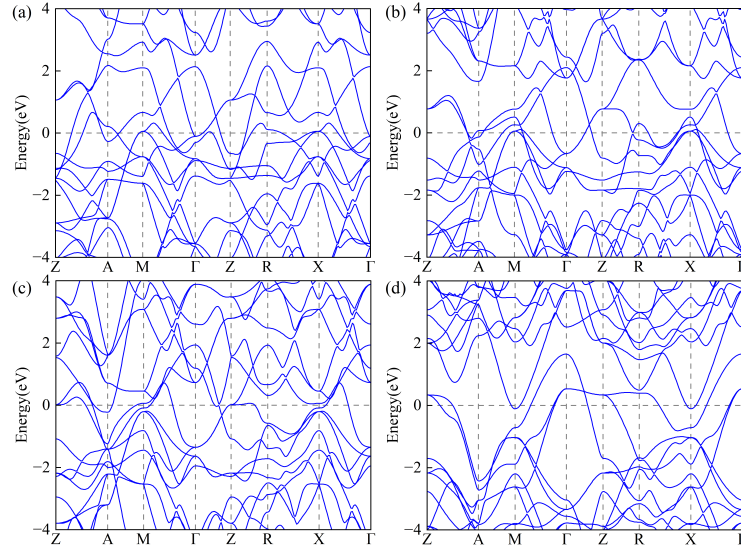

FIG. S1: The band structure for boron-carbon clathrates under ambient pressure. (a)  $\text{In}_2\text{B}_8\text{C}_4$ , (b)  $\text{Pb}_2\text{B}_8\text{C}_4$ , (c)  $\text{Bi}_2\text{B}_8\text{C}_4$  and (d)  $\text{Pr}_2\text{B}_8\text{C}_4$ .

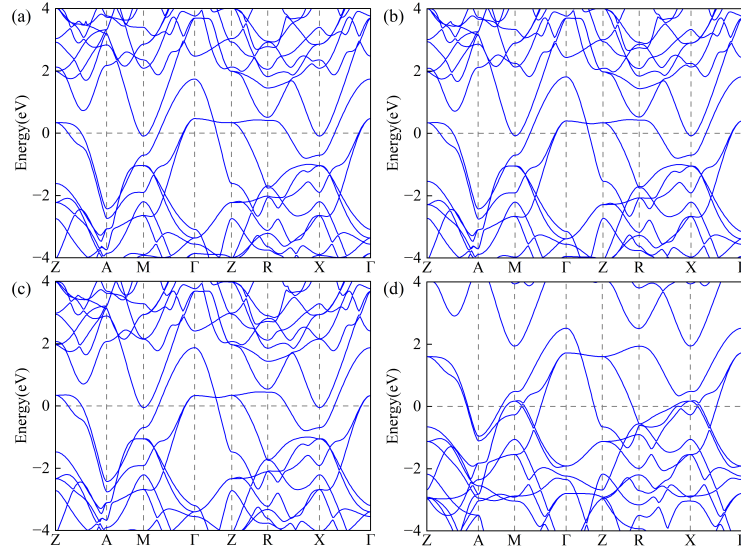

FIG. S2: The band structure for boron-carbon clathrates under ambient pressure. (a)  $\text{Nd}_2\text{B}_8\text{C}_4$ , (b)  $\text{Pm}_2\text{B}_8\text{C}_4$ , (c)  $\text{Sm}_2\text{B}_8\text{C}_4$  and (d)  $\text{Eu}_2\text{B}_8\text{C}_4$ .

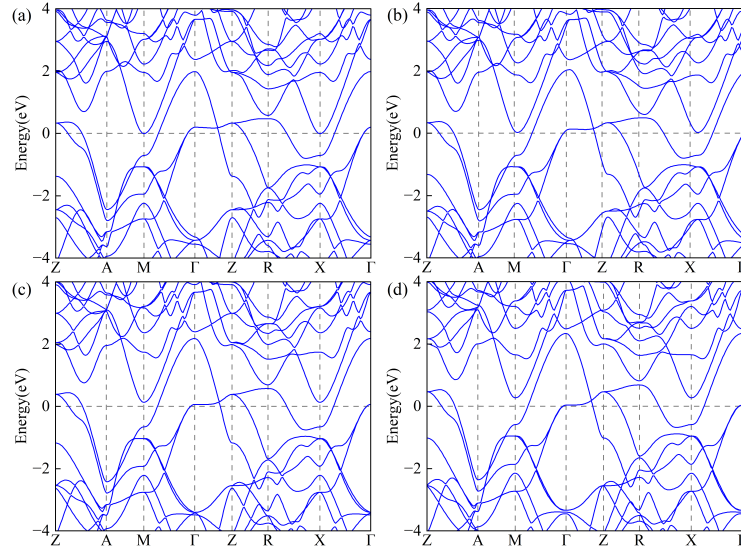

FIG. S3: The band structure for boron-carbon clathrates under ambient pressure. (a)  $\text{Gd}_2\text{B}_8\text{C}_4$ , (b)  $\text{Tb}_2\text{B}_8\text{C}_4$ , (c)  $\text{Ho}_2\text{B}_8\text{C}_4$  and (d)  $\text{Er}_2\text{B}_8\text{C}_4$ .

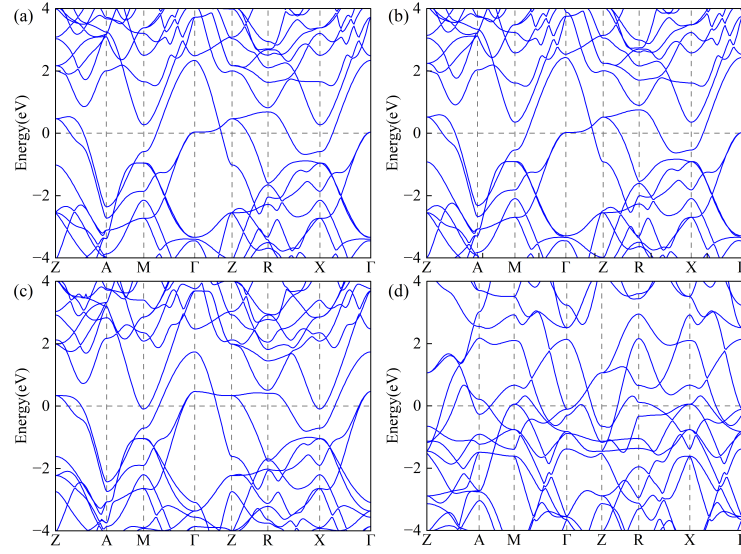

FIG. S4: The band structure for boron-carbon clathrates under ambient pressure. (a)  $\text{Tm}_2\text{B}_8\text{C}_4$ , (b)  $\text{Yb}_2\text{B}_8\text{C}_4$ , (c)  $\text{Lu}_2\text{B}_8\text{C}_4$  and (d)  $\text{Ce}_2\text{B}_8\text{C}_4$ .

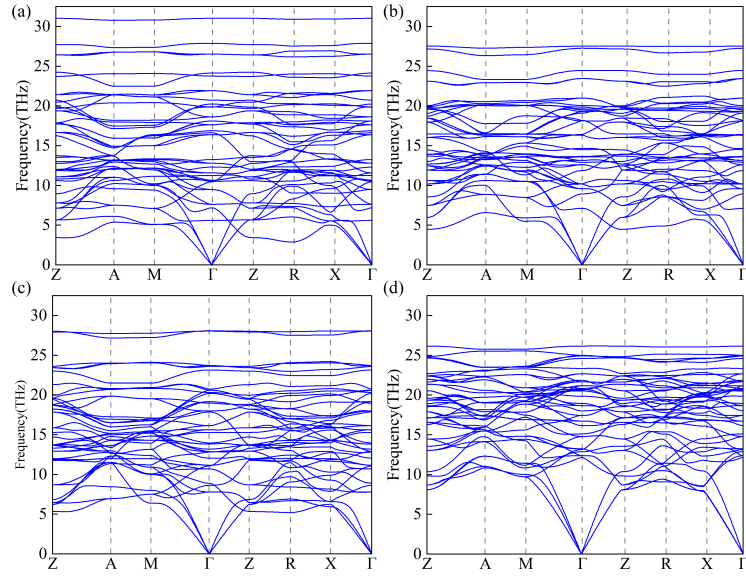

FIG. S5: The phonon spectrum for boron–carbon clathrates under ambient pressure. (a)  $\text{In}_2\text{B}_8\text{C}_4$ , (b)  $\text{Pb}_2\text{B}_8\text{C}_4$ , (c)  $\text{Bi}_2\text{B}_8\text{C}_4$  and (d)  $\text{Pr}_2\text{B}_8\text{C}_4$ .

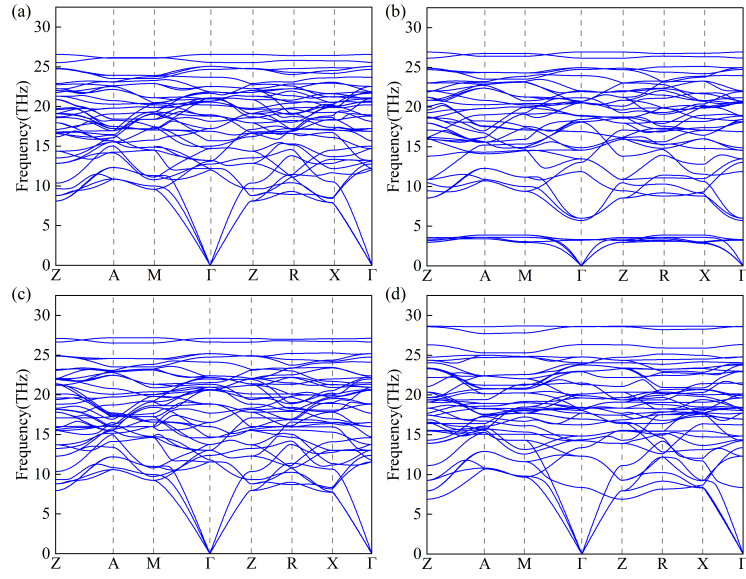

FIG. S6: The phonon spectrum for boron-carbon clathrates under ambient pressure. (a)  $\text{Nd}_2\text{B}_8\text{C}_4$ , (b)  $\text{Pm}_2\text{B}_8\text{C}_4$ , (c)  $\text{Sm}_2\text{B}_8\text{C}_4$  and (d)  $\text{Eu}_2\text{B}_8\text{C}_4$ .

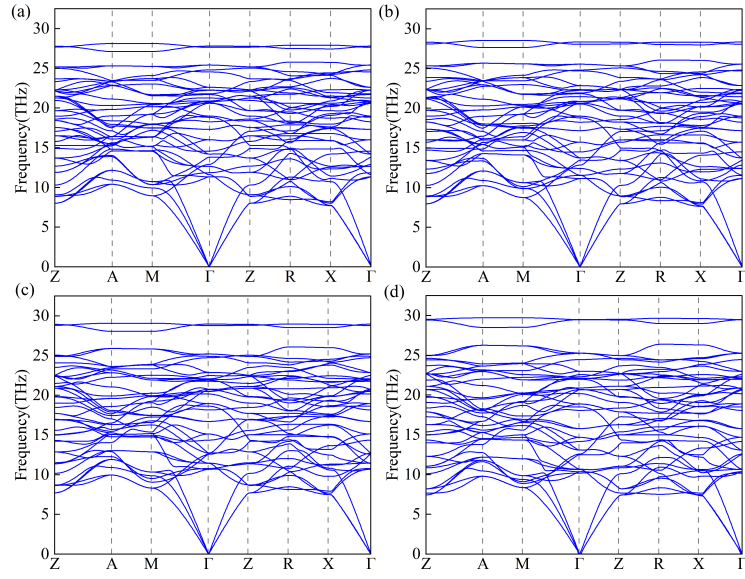

FIG. S7: The phonon spectrum for boron-carbon clathrates under ambient pressure. (a)  $\text{Gd}_2\text{B}_8\text{C}_4$ , (b)  $\text{Tb}_2\text{B}_8\text{C}_4$ , (c)  $\text{Ho}_2\text{B}_8\text{C}_4$  and (d)  $\text{Er}_2\text{B}_8\text{C}_4$ .

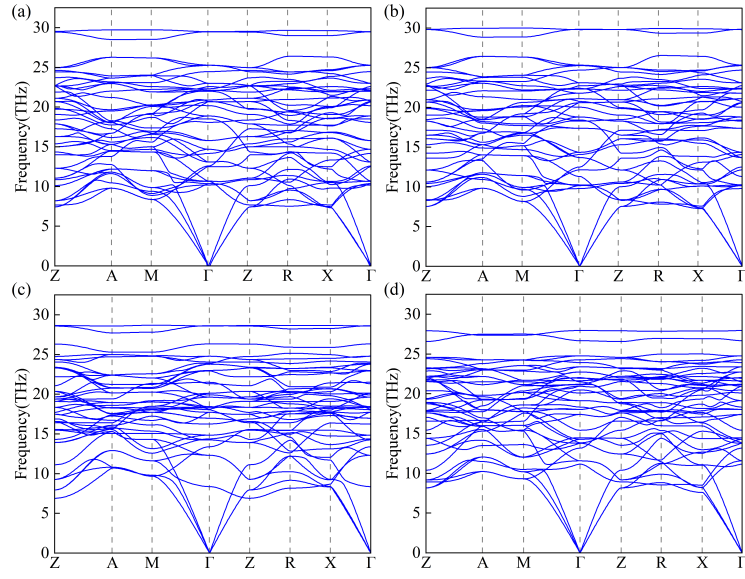

FIG. S8: The phonon spectrum for boron-carbon clathrates under ambient pressure. (a)  $\text{Tm}_2\text{B}_8\text{C}_4$ , (b)  $\text{Yb}_2\text{B}_8\text{C}_4$ , (c)  $\text{Lu}_2\text{B}_8\text{C}_4$  and (d)  $\text{Ce}_2\text{B}_8\text{C}_4$ .

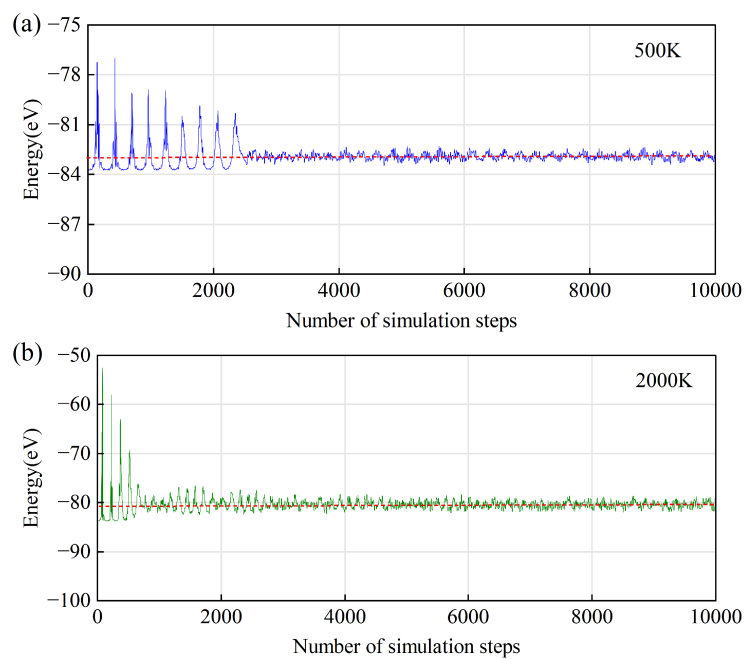

FIG. S9: The AIMD curves for  $\text{Rb}_2\text{B}_8\text{C}_4$ . (a) 500 k (b) 2000 K

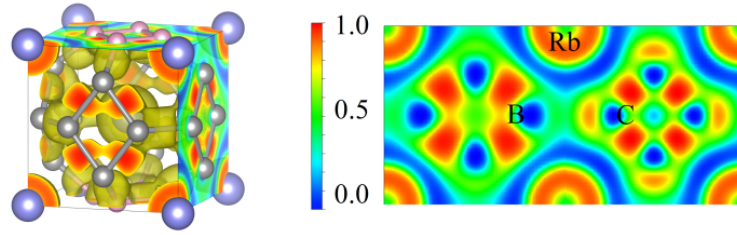

FIG. S10: 3D electron density isosurfaces and ELF plot of  $\text{Rb}_2\text{B}_8\text{C}_4$  under ambient pressure.

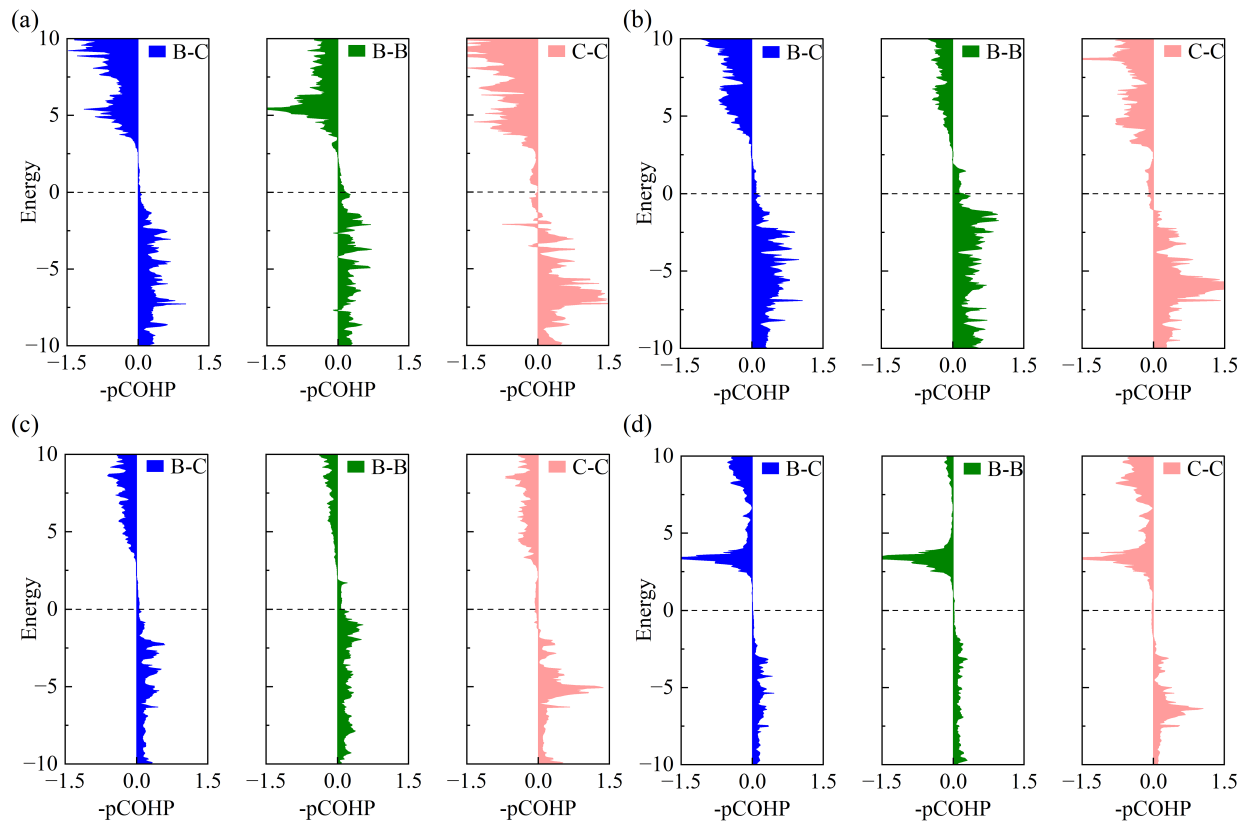

FIG. S11: The  $-p\text{COHP}$  curves for boron-carbon clathrates under ambient pressure. (a)  $\text{Ca}_2\text{B}_8\text{C}_4$ , (b)  $\text{Sr}_2\text{B}_8\text{C}_4$ , (c)  $\text{Ba}_2\text{B}_8\text{C}_4$  and (d)  $\text{La}_2\text{B}_8\text{C}_4$ .

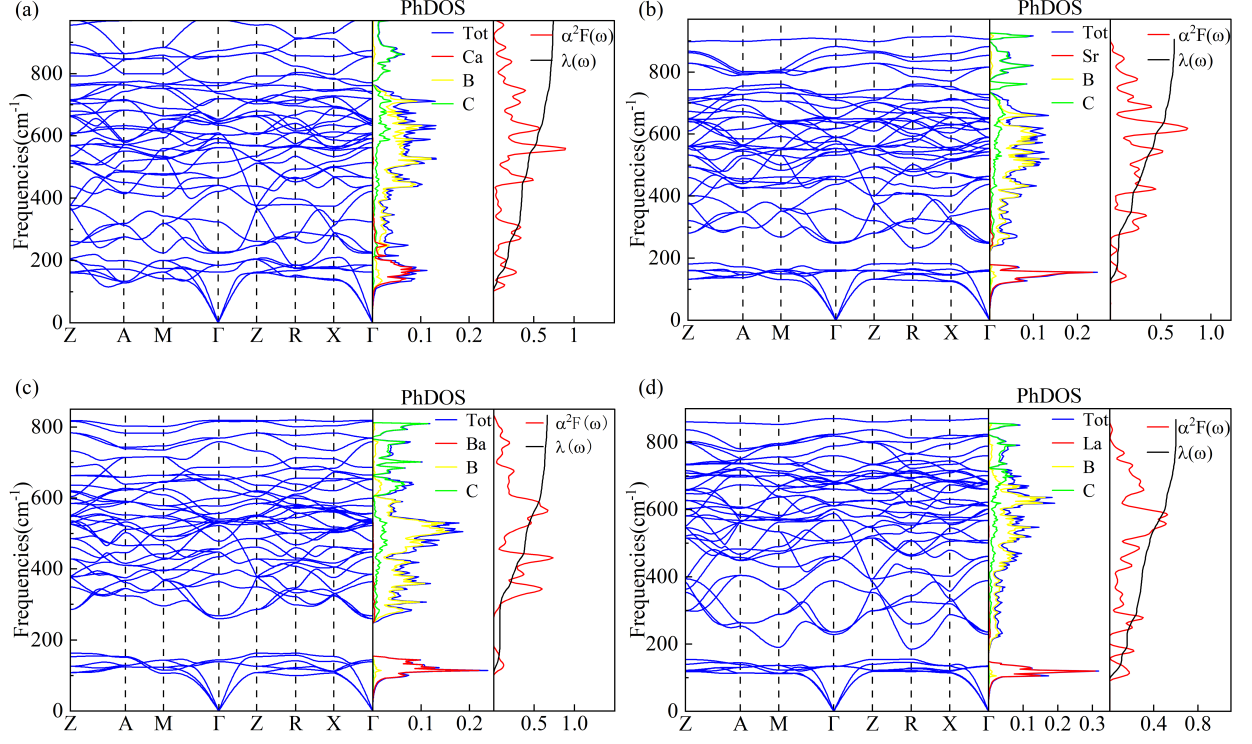

FIG. S12: The calculated PhDOS,  $\alpha^2 F(\omega)$ , and EPC integrals  $\lambda(\omega)$  for boron-carbon clathrates under ambient pressure. (a)  $\text{Ca}_2\text{B}_8\text{C}_4$ , (b)  $\text{Sr}_2\text{B}_8\text{C}_4$ , (c)  $\text{Ba}_2\text{B}_8\text{C}_4$  and (d)  $\text{La}_2\text{B}_8\text{C}_4$ .

---

\* Electronic address: [lucheng@calypso.cn](mailto:lucheng@calypso.cn)
